# Supplementary material for: The epidemiology of atopic dermatitis in older adults: A population-based study in the United Kingdom
Source: PLOS journal article supplement (doi:10.1371/journal.pone.0258219), 2021-10-06

**S1 Fig. Correcting for ascertainment bias.** Local polynomial smoothed plots with shading indicating the 95% CIs generated from yearly cross-sectional calculations of the prevalence of atopic dermatitis from ages 0 to 99 within a 1% random sample of the population. In a correction for ascertainment bias, the prevalence of atopic dermatitis by year of age was restricted to those who had at least one medical code corresponding to a physician's visit during that year.

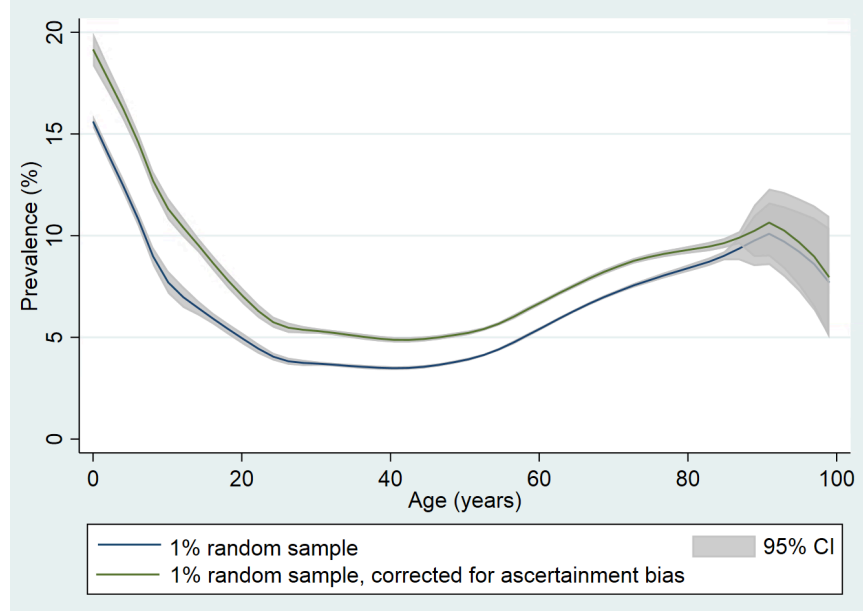

Supplement: S1 (10.1371/journal.pone.0258219.s001) [file journal.pone.0258219.s001]
